# Supplementary material for: Effect of breeding on nitrogen use efficiency-associated traits in oilseed rape
Source: PubMed Central journal article supplement (PMC6436158; doi:10.1093/jxb/erz044), 2019-02-09
Supplement: erz044_suppl_supplementary_figures_s1-s4.pdf [file erz044_suppl_supplementary_figures_s1-s4.pdf]

# **Effect of breeding on nitrogen use efficiency associated traits in oilseed rape**

Andreas Stahl<sup>1\*</sup>, Paul Vollrath<sup>1</sup>, Birgit Samans<sup>1</sup>, Matthias Frisch<sup>2</sup>, Benjamin Wittkop<sup>1</sup> and Rod J. Snowdon<sup>1</sup>

<sup>1</sup> Department of Plant Breeding, IFZ Research Centre for Biosystems, Land Use and Nutrition, Justus Liebig University, Heinrich Buff-Ring 26-32, 35392 Giessen, Germany

<sup>2</sup> Department of Biometry and Population Genetics, IFZ Research Centre for Biosystems, Land Use and Nutrition, Justus Liebig University, Heinrich Buff-Ring 26-32, 35392 Giessen, Germany

## **Supplementary Figures**

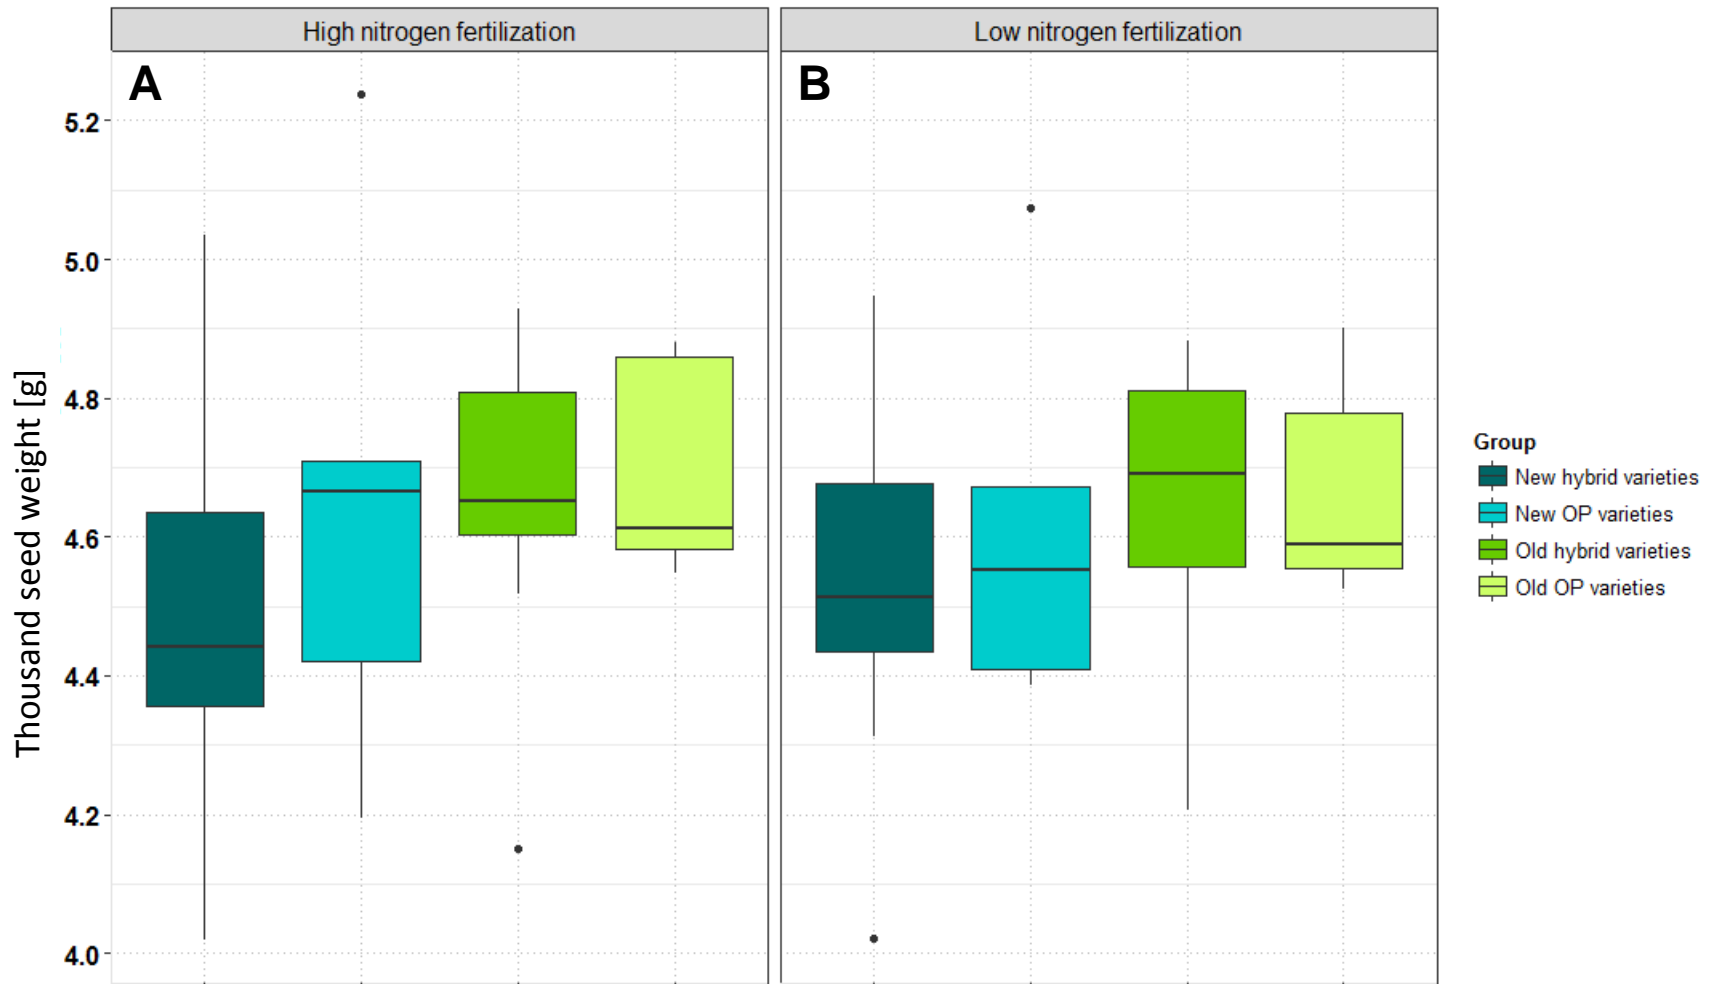

**Supplementary Figure 1:** Average adjusted means of thousand seed weight (TSW) for individual variety groups determined over six environments at (A) high and (B) low nitrogen fertilization.

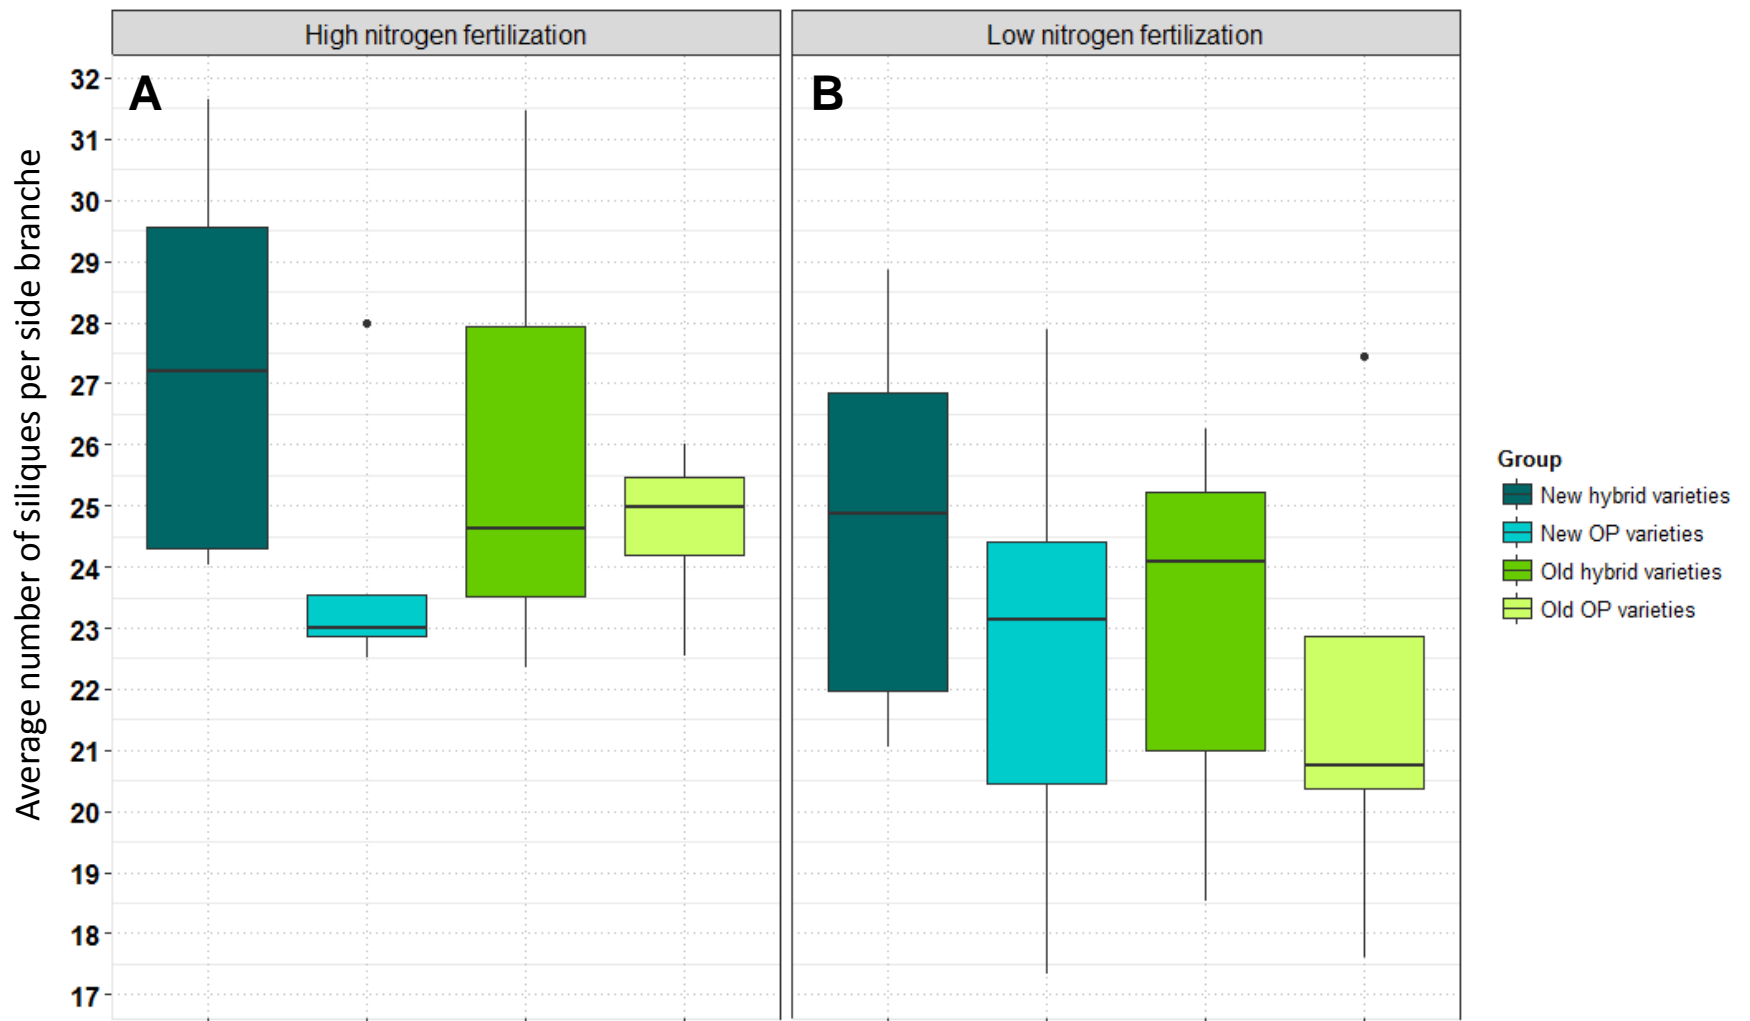

**Supplementary Figure 2:** Average adjusted means for density of siliques on side branches for individual variety groups determined over six environments at (A) high and (B) low nitrogen fertilization, respectively.

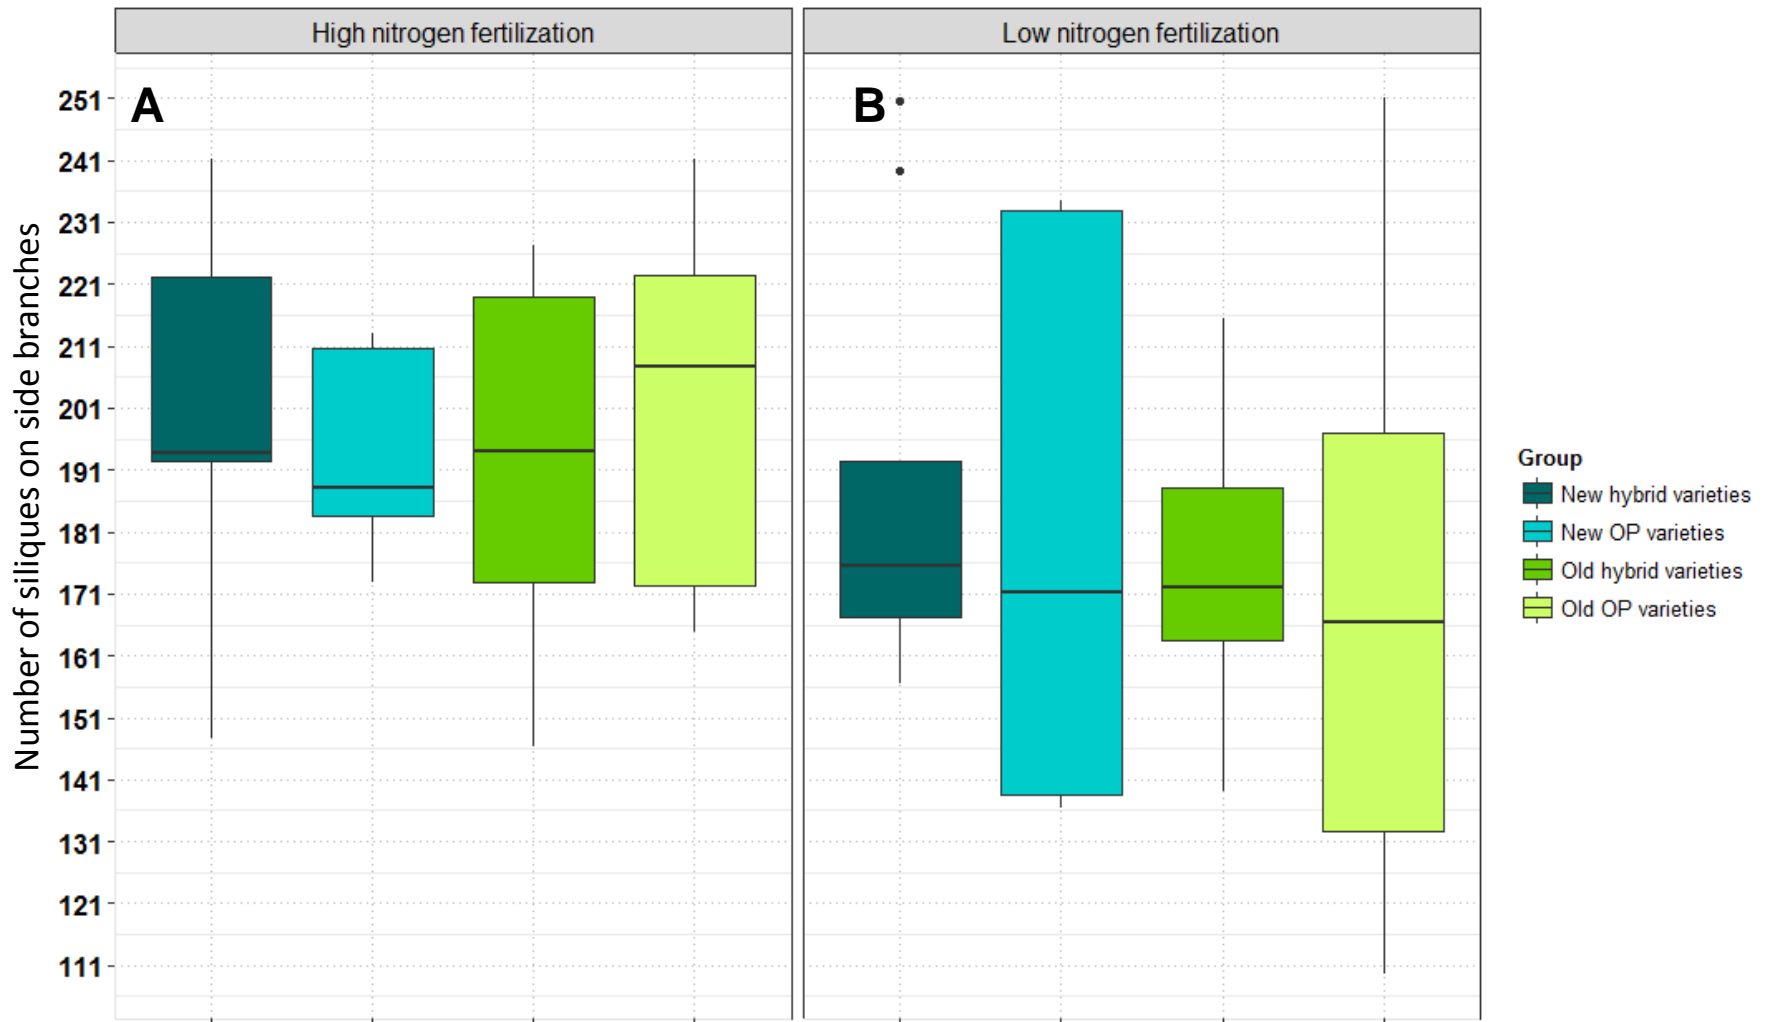

**Supplementary Figure 3:** Average adjusted means of number of siliques per branche for side branches at (A) high and (B) low nitrogen fertilization, respectively.

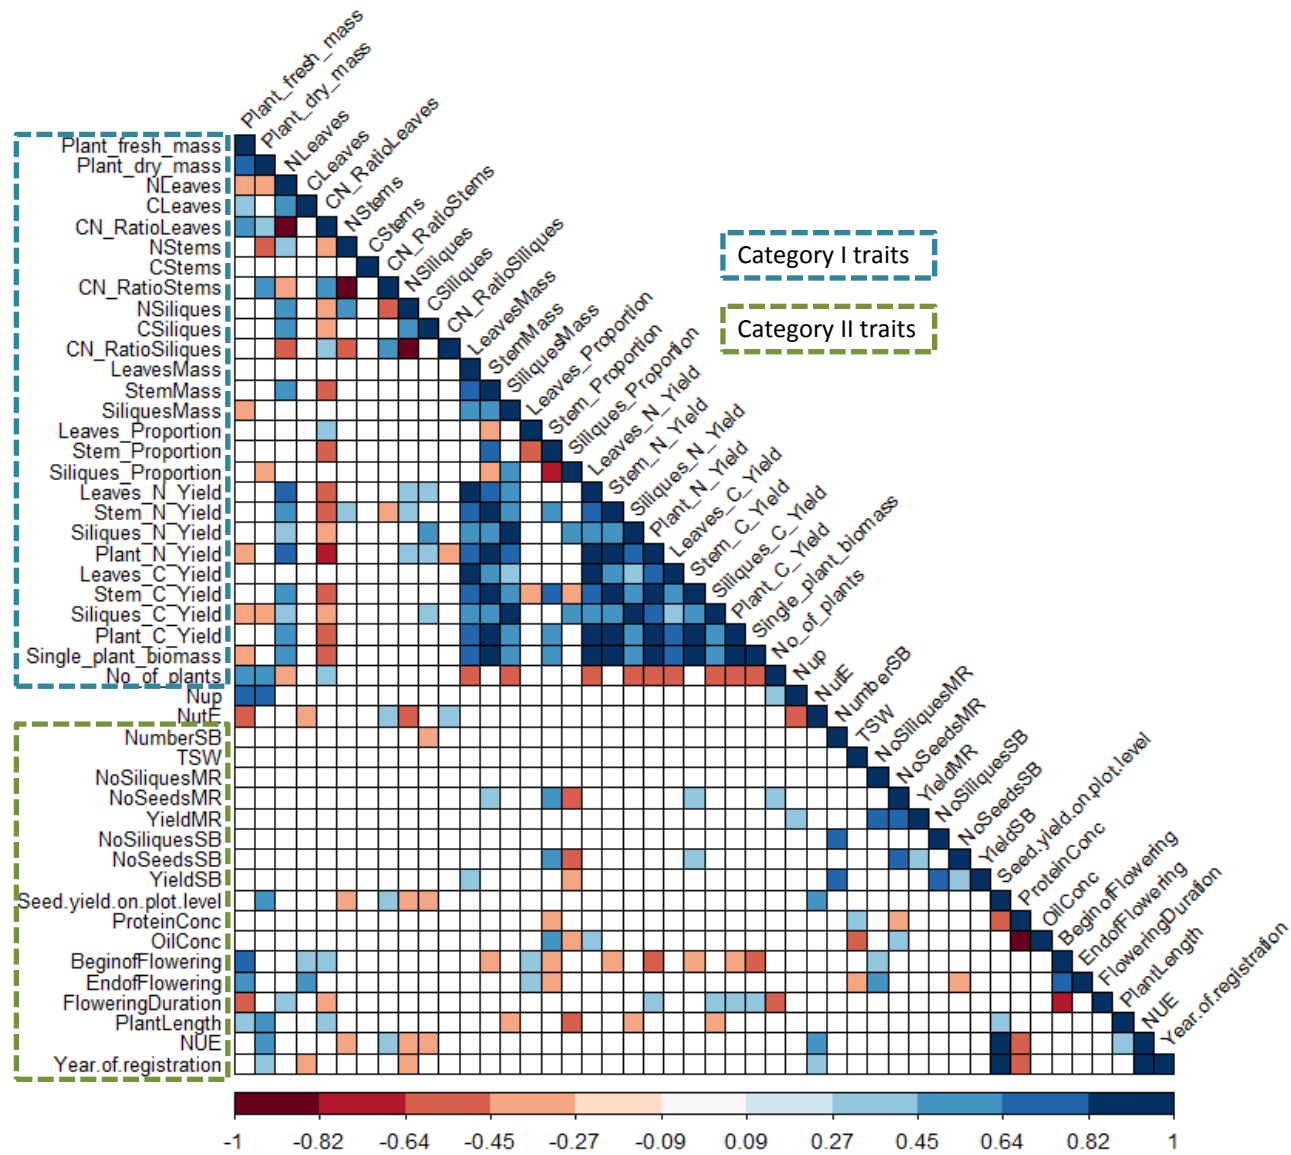

**Supplementary Figure 4a:** Inter-trait correlations among all investigated traits at low nitrogen fertilization. Direction and strength of Pearson's coefficient of correlation is depicted by the color code. Non-significant correlations are shown as white boxes.

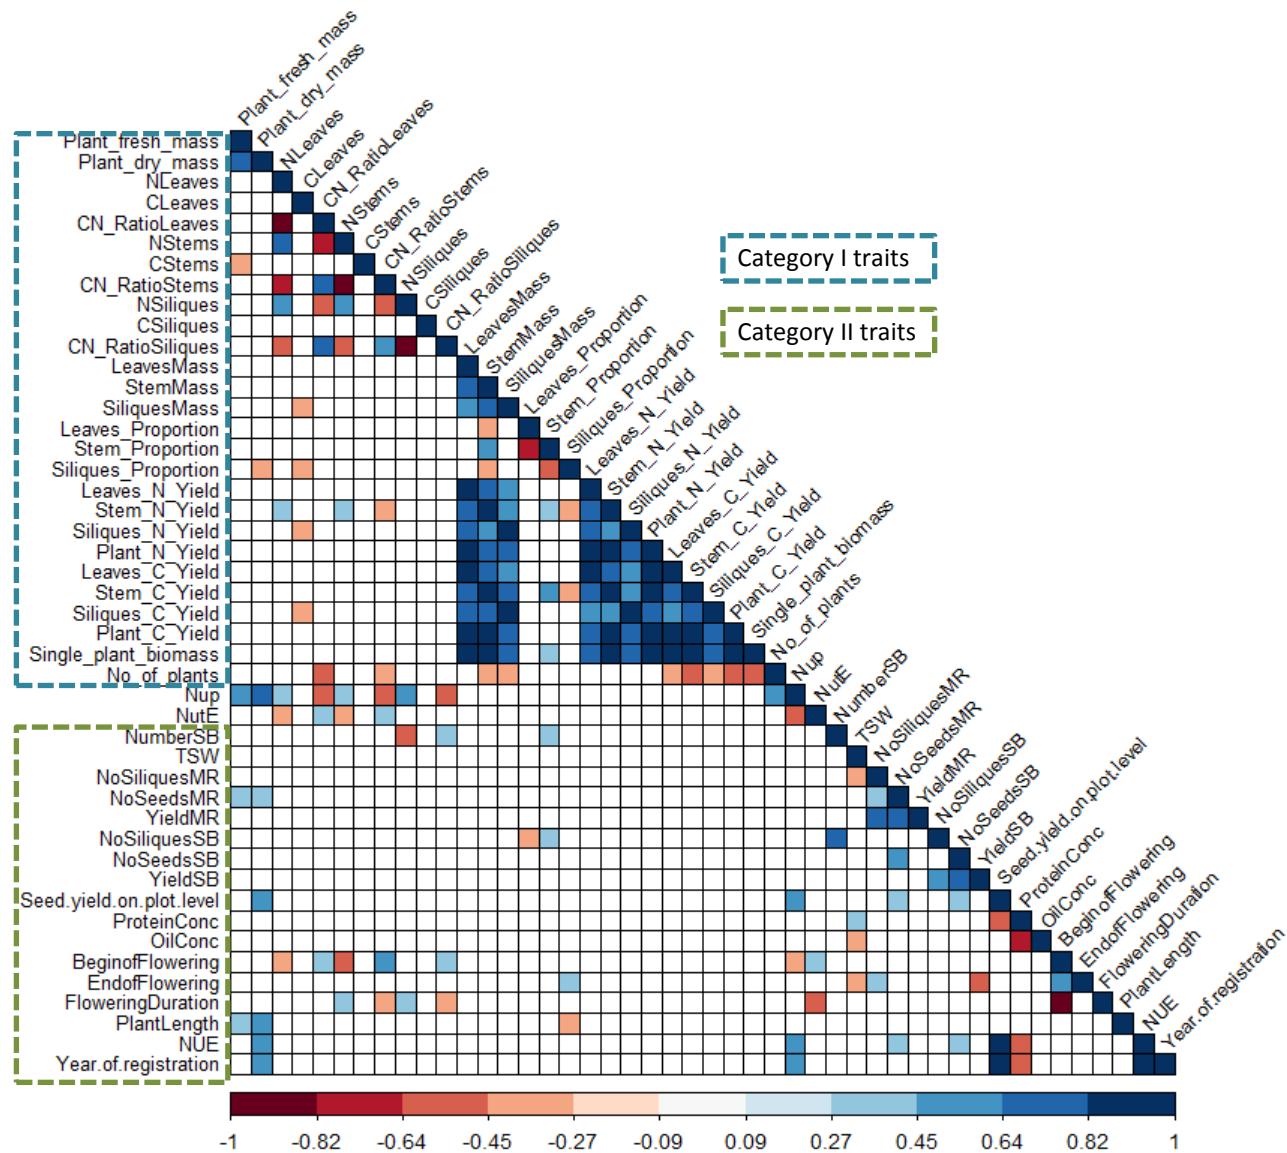

**Supplementary Figure 4b:** Inter-trait correlations among all investigated traits at high nitrogen fertilization. Direction and strength of Pearson's coefficient of correlation is depicted by the color code. Non-significant correlations are shown as white boxes.
