# Supplementary material for: Effect of breeding on nitrogen use efficiency-associated traits in oilseed rape
Source: PubMed Central journal article supplement (PMC6436158; doi:10.1093/jxb/erz044), 2019-02-09
Supplement: erz044_suppl_supplementary_tables_s1-s4.pdf [file erz044_suppl_supplementary_tables_s1-s4.pdf]

Stahl et al.,

**Effect of breeding on nitrogen use efficiency associated  
traits in oilseed rape**

**Supplementary Tables**

**Supplementary Table 1:** Groups of investigated varieties according to year of registration and type of variety

| <b>New hybrid varieties</b> | <b>Year of registration</b> |
|-----------------------------|-----------------------------|
| Thure (SDH)                 | 2014                        |
| Marathon                    | 2013                        |
| Mercedes                    | 2013                        |
| Avatar                      | 2011                        |
| DK Exstorm                  | 2011                        |
| Inspiration                 | 2011                        |
| Genie                       | 2011                        |
| Mascara                     | 2011                        |
| Troy (SDH)                  | 2011                        |
| <b>Old hybrid varieties</b> |                             |
| Artoga                      | 2010                        |
| Sherpa                      | 2010                        |
| Compass                     | 2009                        |
| NK Linus                    | 2009                        |
| Visby                       | 2007                        |
| Exocet                      | 2005                        |
| Taurus                      | 2004                        |
| Baldur                      | 2002                        |
| Elektra                     | 2002                        |
| Ryder                       | 2000                        |
| Artus                       | 1997                        |
| <b>New OP varieties</b>     |                             |
| Patron                      | 2012                        |
| Trinity                     | 2012                        |
| Adriana                     | 2007                        |
| Lorenz                      | 2005                        |
| Oase                        | 2004                        |
| <b>Old OP varieties</b>     |                             |
| Pacific                     | 2003                        |
| Californium                 | 2002                        |
| Aviso                       | 2000                        |
| Express                     | 1993                        |
| Lirajet                     | 1989                        |

SDH = Semi dwarf hybrid

**Supplementary Table 2: Environment specific soil conditions (Stahl et al., 2017)**

| Environment | P <sub>2</sub> O <sub>5</sub><br>[mg/100g] | K <sub>2</sub> O<br>[mg/100g] | Soil<br>pH | Soil Type according to<br>FAO,<br>yield index units | N <sub>min</sub> at<br>beginn of<br>vegetation<br>0-60cm<br>[kg N/ha] | Plot size<br>(harvested area)<br>[m <sup>2</sup> ] |
|-------------|--------------------------------------------|-------------------------------|------------|-----------------------------------------------------|-----------------------------------------------------------------------|----------------------------------------------------|
| ASE15       | 14.8                                       | 15                            | 8.1        | silty loam                                          | 47                                                                    | 12                                                 |
| ASE16       | 7.5                                        | 10                            | NA         | loamy sand, aprox. 45                               | 29                                                                    | 12                                                 |
| MOS15       | 10.9                                       | 13                            | 7.1        | loessic loam                                        | 21                                                                    | 10.2                                               |
| MOS16       | 12.0                                       | 18                            | NA         | loessic loam                                        | 26                                                                    | 10.2                                               |
| RHH15       | 10.4                                       | 6                             | 7.6        | loam,<br>80                                         | 25                                                                    | 10.5                                               |
| RHH16       | 10.6                                       | 7                             | 7          | loam,<br>85                                         | 13                                                                    | 10.5                                               |

**Supplementary Table 3:** List of investigated traits, their abbreviation and overview of environments in which the data were collected.

| category | Abbreviation       | Trait                                           | ASE2015 | ASE2016 | RHH2015 | RHH2016 | MOS2015 | MOS2016 |
|----------|--------------------|-------------------------------------------------|---------|---------|---------|---------|---------|---------|
|          |                    |                                                 |         |         |         |         |         |         |
| I        | PlantFreshMass     | Plant fresh mass on plot level                  |         |         |         |         |         |         |
| I        | PlantDryMass       | Plant dry mass on plot level                    |         |         |         |         |         |         |
| I        | N conc Leaves      | N concentration in leaves                       |         |         |         |         | *       |         |
| I        | C conc Leaves      | C concentration in leaves                       |         |         |         |         | *       |         |
| I        | CN RatioLeaves     | C/N ratio in leaves                             |         |         |         |         | *       |         |
| I        | N conc Stems       | N concentration in stems                        |         |         |         |         | *       |         |
| I        | C conc Stems       | C concentration in stems                        |         |         |         |         | *       |         |
| I        | CN RatioStems      | C/N ratio in stems                              |         |         |         |         | *       |         |
| I        | N conc Siliques    | N concentration in siliques                     |         |         |         |         | *       |         |
| I        | C conc Siliques    | C concentration in siliques                     |         |         |         |         | *       |         |
| I        | CN RatioSiliques   | C/N ratio in siliques                           |         |         |         |         | *       |         |
| I        | LeavesMass         | Leaves mass at flowering on plant level         |         |         |         |         | *       |         |
| I        | StemMass           | Stem mass at flowering on plant level           |         |         |         |         | *       |         |
| I        | SiliquesMass       | Siliques mass at flowering on plant level       |         |         |         |         | *       |         |
| I        | LeavesProportion   | Proportion of leaves on entire plant dry mass   |         |         |         |         | *       |         |
| I        | StemProportion     | Proportion of stems on entire plant dry mass    |         |         |         |         | *       |         |
| I        | SiliquesProportion | Proportion of siliques on entire plant dry mass |         |         |         |         | *       |         |
| I        | LeavesNYield       | N mass in leaves at flowering                   |         |         |         |         | *       |         |
| I        | StemNYield         | N mass in stems at flowering                    |         |         |         |         | *       |         |
| I        | SiliquesNYield     | N mass in siliques at flowering                 |         |         |         |         | *       |         |
| I        | PlantNYield        | N mass in entire plant at flowering             |         |         |         |         | *       |         |
| I        | LeavesCYield       | C mass in leaves at flowering                   |         |         |         |         | *       |         |
| I        | StemCYield         | C mass in stems at flowering                    |         |         |         |         | *       |         |
| I        | SiliquesCYield     | C mass in siliques at flowering                 |         |         |         |         | *       |         |
| I        | PlantCYield        | C mass in entire plant at flowering             |         |         |         |         | *       |         |
| I        | SinglePlantBiomass | Dry weight of single plant                      |         |         |         |         | *       |         |
| I        | NoOfPlants         | Number of plants per square meter               |         |         |         |         | *       |         |
| II       | NoSB               | Number of side branches                         |         |         |         |         |         |         |
| II       | TSW                | Thousand seed weight                            |         |         |         |         |         |         |
| II       | NoSiliquesMR       | Number of siliques on main raceme               |         |         |         |         |         |         |
| II       | NoSeedsMR          | Number of siliques on main raceme               |         |         |         |         |         |         |
| II       | YieldMR            | Yield on main raceme                            |         |         |         |         |         |         |
| II       | NoSiliquesSB       | Number of siliques on side branches             |         |         |         |         |         |         |
| II       | NoSeedsSB          | Number of siliques on side branches             |         |         |         |         |         |         |
| II       | YieldSB            | Yield on side branches                          |         |         |         |         |         |         |
| II       | Seed Yield         | Seed Yield (SY)                                 |         |         |         |         |         |         |
| II       | ProteinConc        | Seed protein concentration at 91% dry mass      |         |         |         |         |         |         |
| II       | Oilconc            | Seed oil concentration at 91% dry mass          |         |         |         |         |         |         |
| II       | BeginofFl          | Begin of flowering                              |         |         |         |         |         |         |
| II       | EndofFl            | End of flowering                                |         |         |         |         |         |         |
| II       | FlowDuration       | Duration of flowering                           |         |         |         |         |         |         |
| II       | Pllength           | Plant length                                    |         |         |         |         |         |         |
| II       | NUE                | Nitrogen use efficiency                         |         |         |         |         |         |         |
| I        | Nup                | Nitrogen uptake efficiency                      |         |         |         |         |         |         |
| I        | NutE               | Nitrogen utilization efficiency                 |         |         |         |         |         |         |

Grey shaded areas indicate those environments where data were collected.

\* Data of high nitrogen treatment were collected only in one replication in this particular environment.

Plant partitioning into ground stem, leaf and silique samples and subsequent C/N analysis was conducted for low N treatment at both locations in both years (n=12) and for high treatment at RHH2015 in three replications and additionally in MOS2015 in one further replication (n=4).

**Supplementary Table 4:** Number of investigated varieties (white) and total number of analyzed plants (grey) for yield components after elimination of outliers ( $\pm 2.5$  SD from the overall mean). MR: Main raceme, SB: side branches

| Year                   | Location | NFL | NoSB | TSW  | NoSiliques | Yield | NoSeeds | NoSiliques | Yield | NoSeed |
|------------------------|----------|-----|------|------|------------|-------|---------|------------|-------|--------|
|                        |          |     |      |      | MR         | MR    | MR      | SB         | SB    | SB     |
| 2015                   | ASE      | 1   | 30   | 30   | 30         | 30    | 30      | 30         | 30    | 30     |
| 2015                   | ASE      | 2   | 30   | 30   | 30         | 30    | 30      | 30         | 30    | 30     |
| 2015                   | MOS      | 1   | 30   | 30   | 30         | 27    | 30      | 29         | 27    | 30     |
| 2015                   | MOS      | 2   | 30   | 30   | 30         | 27    | 28      | 29         | 27    | 28     |
| 2015                   | RHH      | 1   | 30   | 30   | 30         | 30    | 30      | 30         | 30    | 30     |
| 2015                   | RHH      | 2   | 30   | 30   | 30         | 30    | 30      | 30         | 30    | 30     |
| 2016                   | ASE      | 1   | 29   | 29   | 29         | 29    | 29      | 29         | 29    | 29     |
| 2016                   | ASE      | 2   | 29   | 29   | 29         | 29    | 29      | 29         | 29    | 29     |
| 2016                   | MOS      | 1   | 29   | 29   | 29         | 29    | 29      | 29         | 29    | 29     |
| 2016                   | MOS      | 2   | 29   | 29   | 29         | 29    | 29      | 29         | 29    | 29     |
| 2016                   | RHH      | 1   | 25   | 29   | 26         | 26    | 26      | 26         | 26    | 26     |
| 2016                   | RHH      | 2   | 29   | 29   | 29         | 29    | 29      | 29         | 28    | 29     |
| Total number of plants |          |     | 1041 | 1059 | 1036       | 1031  | 1029    | 1022       | 1018  | 1021   |
